# Supplementary material for: Zwitterion-functionalized hollow mesoporous Prussian blue nanoparticles for targeted and synergetic chemo-photothermal treatment of acute myeloid leukemia
Source: Royal Society of Chemistry journal article supplement (doi:10.1039/d1tb00548k), 2021-01-01
Supplement: d1tb00548k1.pdf [file d1tb00548k1.pdf]

# **Zwitterion-Functionalized Hollow Mesoporous Prussian Blue Nanoparticles for Targeted and Synergetic Chemo-Photothermal Treatment of Acute Myeloid Leukemia**

Huiyuan Bai,<sup>a</sup> Quanhao Sun,<sup>a</sup> Fei Kong,<sup>a</sup> Haijiao Dong,<sup>a</sup> Ming Ma,<sup>a</sup> Fangzhou Liu,<sup>c</sup> Chen Wang,<sup>d</sup> Haiyan Xu,<sup>b,\*</sup> Ning Gu,<sup>a,\*</sup> and Yu Zhang<sup>a,\*</sup>

<sup>a</sup>State Key Laboratory of Bioelectronics, Jiangsu Key Laboratory for Biomaterials and Devices, School of Biological Science and Medical Engineering and Collaborative, Innovation Center of Suzhou Nano Science and Technology, Southeast University, Nanjing 210096, P. R. China.

<sup>b</sup>Institute of Basic Medical Sciences, Chinese Academy of Medical Sciences & Peking Union Medical College, Beijing 100005, P. R. China.

<sup>c</sup>Department of Head & Neck Surgery, Jiangsu Cancer Hospital & Jiangsu Institute of Cancer Research, The Affiliated Cancer Hospital of Nanjing Medical University, Nanjing 210029, P. R. China.

<sup>d</sup>National Center for Nanoscience and Technology, Beijing 100190, P. R. China.

Corresponding Author

\*E-mail: zhangyu@seu.edu.cn, guning@seu.edu.cn, xuhy@pumc.edu.cn

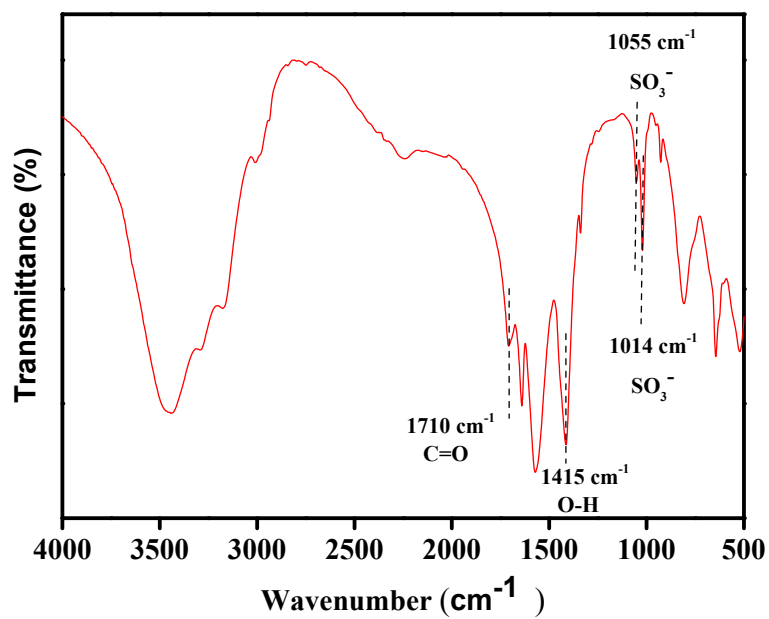

Fig. S1 FTIR spectrum of sulfobetaine zwitterion. The FT-IR spectrum showed characteristic absorption peaks at 1710 and 1415  $\text{cm}^{-1}$ , which are assigned to the C=O stretching vibration and the O-H flexure vibration in AA, respectively. The characteristic peaks at 1055 and 1014  $\text{cm}^{-1}$  are assigned to SO<sub>3</sub><sup>-</sup> group in DMAPS.

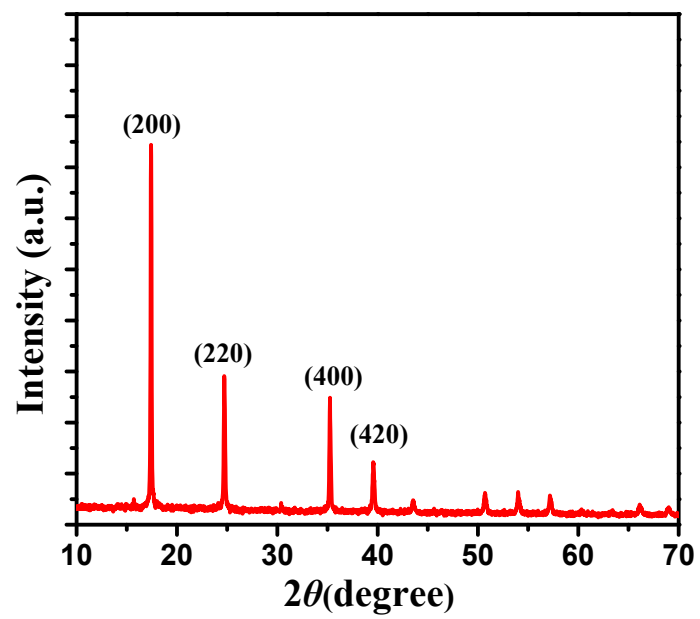

Fig. S2 XRD analysis of HMPBs@PEI-ZS-E5.

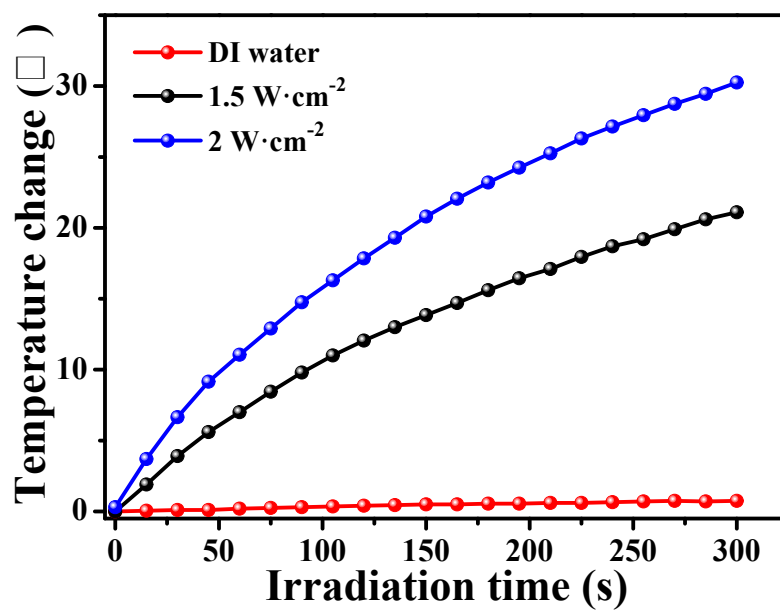

Fig. S3 Temperature change of the HMPBs@PEI-ZS-E5 dispersion upon laser exposure at a power density of b) 1.5 and c) 2 W cm<sup>-2</sup>.

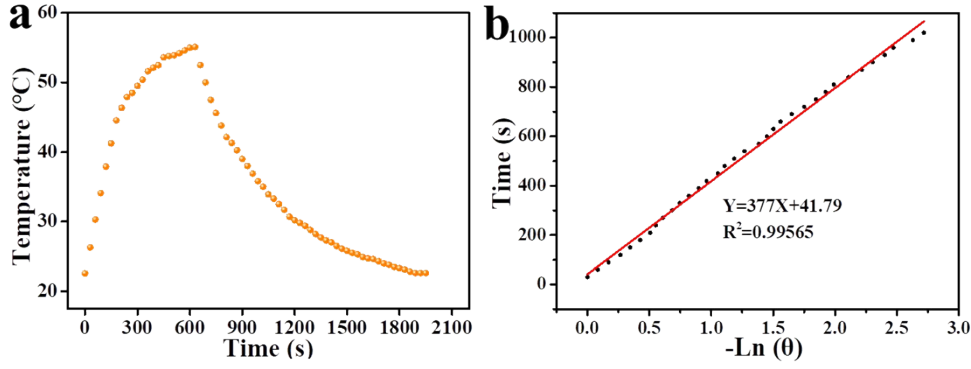

Fig. S4 (a) The aqueous dispersion of HMPBs@PEI-ZS-E5 ( $100 \mu\text{g mL}^{-1}$ ) was irradiated with 808 nm laser ( $2 \text{ W/cm}^2$ ). After the temperature reach steady state, the laser was shut off, and the temperature of the dispersion was recorded. (b)  $\tau_s$  is determined to be 377 s by using the time data from the cooling period versus negative logarithm of driving force temperature.  $R^2 = 0.995$ .

The photothermal conversion efficiency of HMPBs@PEI-ZS-E5 was calculated according to Korgel's report.<sup>1</sup>

$$\eta = \frac{hA(T_{max} - T_{surr}) - Q_{dis}}{I(1 - 10^{-A(\lambda)})} \quad (1)$$

In Equation (1),  $h$ ,  $A$ ,  $T_{max}$ ,  $T_{surr}$ ,  $Q_{dis}$ ,  $I$ ,  $A(\lambda)$  and  $\eta$  represent heat transfer coefficient, surface area of the container, the maximum steady-state temperature, ambient temperature of the surroundings, heat loss for the light absorbed by the container, the laser power (in units of mW), the absorbance at 808 nm and the photothermal conversion efficiency, respectively.

$$hA = mc/\tau_s \quad (2)$$

In Equation (2),  $m$ ,  $c$  and  $\tau_s$  represent the mass of the solvent (water), heat capacity of the water and time constant for heat transfer from the system, respectively.

$$t = -\tau_s \ln \theta$$

$$\theta = \frac{T - T_{surr}}{T_{max} - T_{surr}} \quad (4)$$

$$Q_{dis} = hA(T_{max,water} - T_{surr,water}) \quad (5)$$

The  $\tau_s$  is determined to be 377 s by applying the linear time data from the cooling period vs negative natural logarithm of driving force temperature (Fig. S4b). The  $m$  is

1.5 g and the  $c$  is  $4.2 \text{ J/(g} \cdot ^\circ\text{C)}$ . Thus, according to Equation 2, the  $hA$  is deduced to be  $16.7 \text{ mW/}^\circ\text{C}$ . Since  $T_{max,water}$  minus  $T_{surr,water}$  is 1.85,  $Q_{dis}$  was calculated to be  $30.9 \text{ mW}$  via Equation 5. In addition, the absorbance at 808 nm is 0.45,  $T_{max}$  minus  $T_{surr}$  is

32.45 and  $I$  is 2 W/cm<sup>2</sup>. Therefore, according to Equation 1,  $\eta$  of HMPBs@PEI-ZS-E5 can be calculated to be 39.6%.

1. X. Cai, X. Jia, W. Gao, K. Zhang, M. Ma, S. Wang, Y. Zheng, J. Shi and H. Chen, *Advanced Functional Materials*, 2015, 25, 2520-2529.

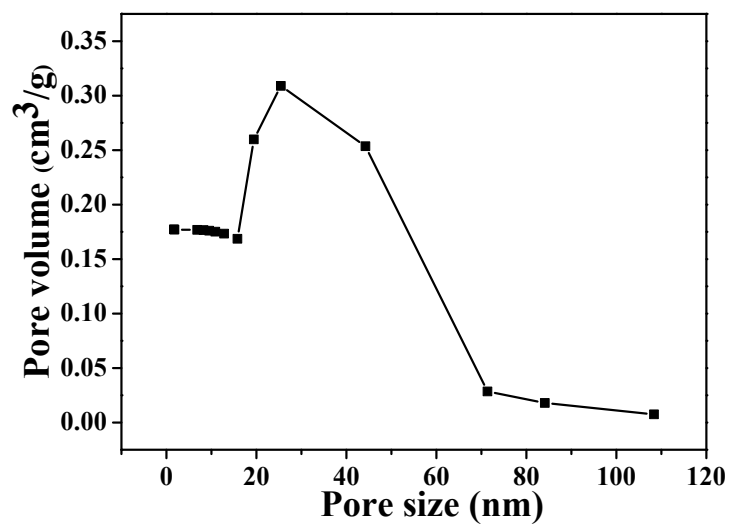

Fig. S5 Pore size distributions of HMPBs.

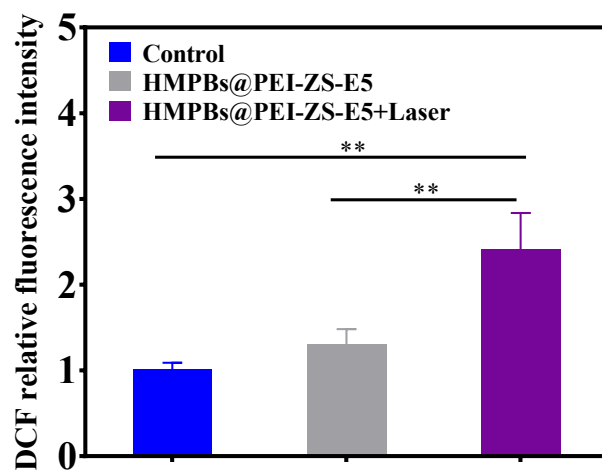

Fig. S6 DCF relative fluorescence intensity of HL60 cells treated with  $50 \mu\text{g mL}^{-1}$  HMPBs@PEI-ZS-E5 with or without laser irradiation was measured by fluorescence spectrophotometer.

Table 1 Primer sequences for qRT-PCR to assess the expression of Caspase3 and GAPDH genes in HL60 cells

| Gene name | Primer sequences (5' to '3)                                       |
|-----------|-------------------------------------------------------------------|
| Caspase3  | F: 5'-AGAACTGGACTGTGGCATTGAG-3'<br>R: 5'-CACAAAGCGACTGGATGAACC-3' |
| GAPDH     | F:5'-GGAAGCTTGTCATCAATGGAAATC-3'<br>R: 5'-TGATGACCCTTTTGGCTCCC-3' |

Table 2 The drug loading efficiency of different HMPBs

| drug name | HMPBs(DNR+AraC) | HMPBs(DNR+AraC)<br>PEI-ZS | (DNR+AraC)<br>@PEI-ZS-E5 |
|-----------|-----------------|---------------------------|--------------------------|
| DNR       | 16.41±2.1%      | 15.88±1.31%               | 16.2±1.17%               |
| AraC      | 11.89±1.02%     | 12.1±1.87%                | 12.4±1.32%               |
